# Supplementary material for: Synthesis of a borylated boron–dibenzopyrromethene dye enabling the visual detection of H2O2 vapor
Source: Royal Society of Chemistry journal article supplement (doi:10.1039/c4ra06061j), 2014-01-01
Supplement: c4ra06061j1.pdf [file c4ra06061j1.pdf]

## Electronic Supplementary Information

### Synthesis of a borylated boron-dibenzopyrromethene enabling visual detection of H<sub>2</sub>O<sub>2</sub> vapor

Asaki Matsumoto, Ryuhei Nishiyabu and Yuji Kubo\*

*Department of Applied Chemistry, Graduate School of Urban Environmental Sciences, Tokyo Metropolitan University, 1-1 Minami-ohsawa, Hachioji Tokyo, 192-0397.*

*E-mail: yujik@tmu.ac.jp*

#### Table of Contents

|    |                                                                                                                              |      |
|----|------------------------------------------------------------------------------------------------------------------------------|------|
| 1. | <sup>1</sup> H NMR spectrum of dye <b>4</b>                                                                                  | S1   |
| 2. | <sup>1</sup> H NMR spectrum of dye <b>5</b>                                                                                  | S2   |
| 3. | Characterization of <b>1</b>                                                                                                 | S3-7 |
| 4. | <sup>1</sup> H NMR spectrum of dye <b>6</b>                                                                                  | S8   |
| 5. | Time course of fluorescence spectra of <b>1</b> (5 μM) in the presence of TBAOH                                              | S9   |
| 6. | The photograph of <b>1</b> and <b>1</b> with H <sub>2</sub> O <sub>2</sub> in EtOH/H <sub>2</sub> O in the presence of TBAOH | S10  |

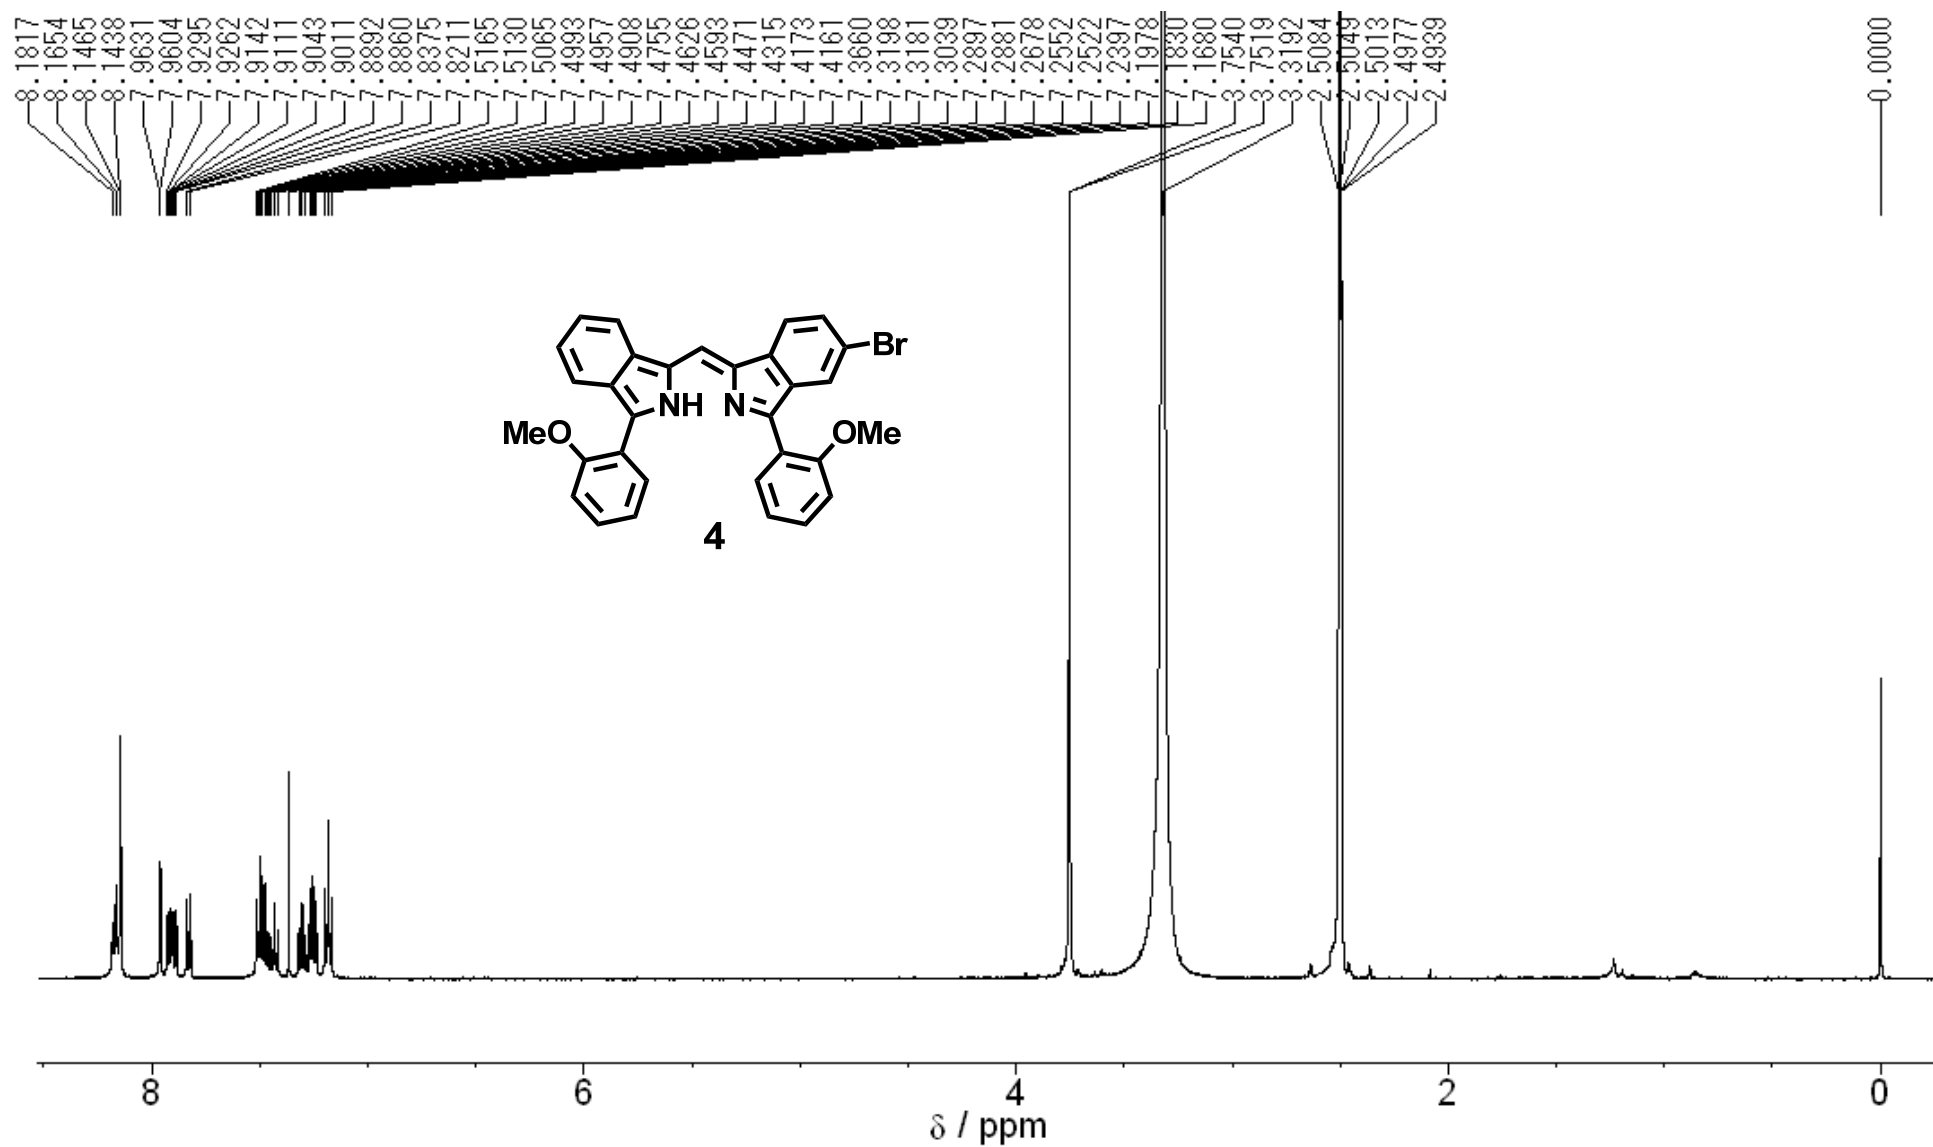

Fig. S1  $^1\text{H NMR}$  spectrum of dye 4 in  $\text{DMSO-}d_6$  at room temperature.

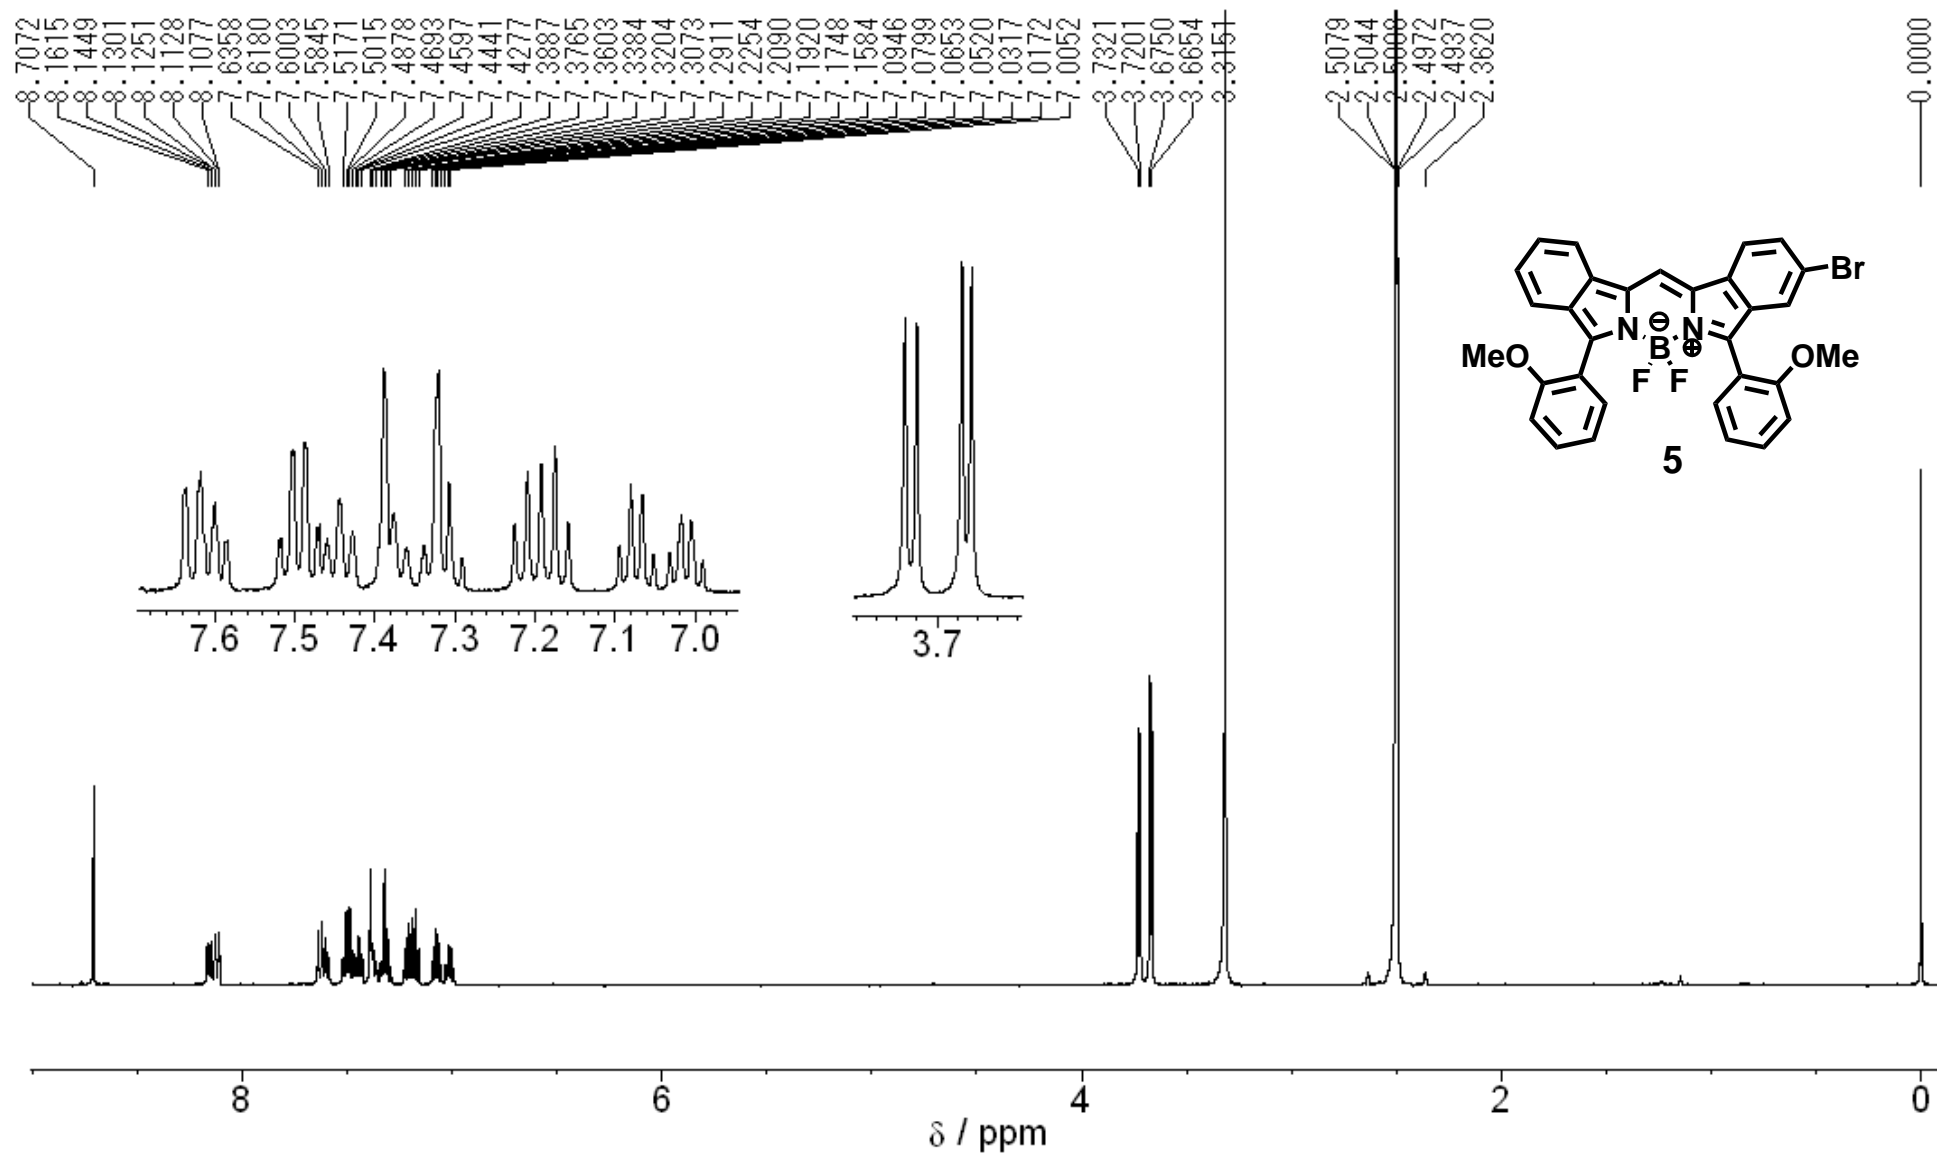

Fig. S2  $^1\text{H}$  NMR spectrum of dye **5** in  $\text{DMSO-}d_6$  at room temperature.

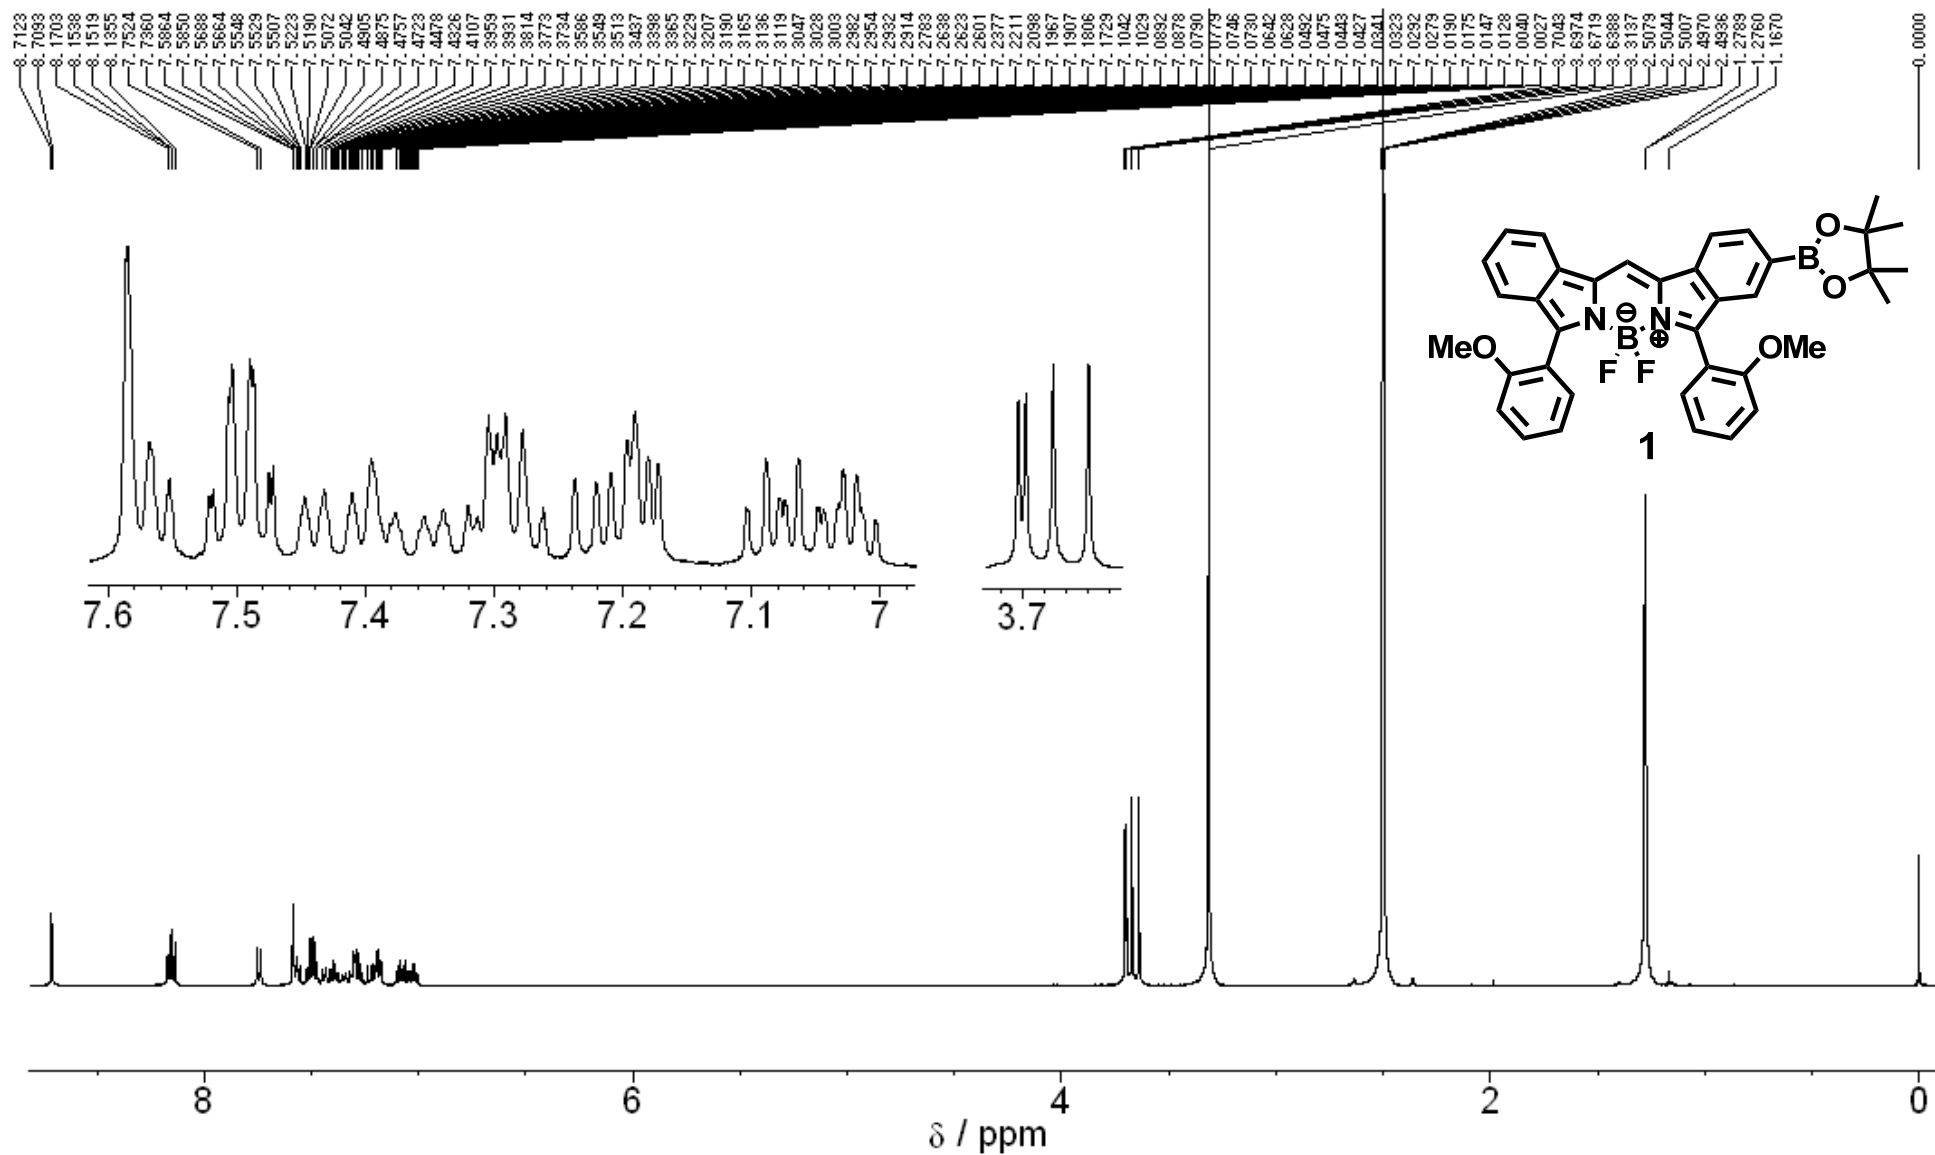

Fig. S3  $^1\text{H}$  NMR spectrum of dye **1** in  $\text{DMSO-}d_6$  at room temperature.

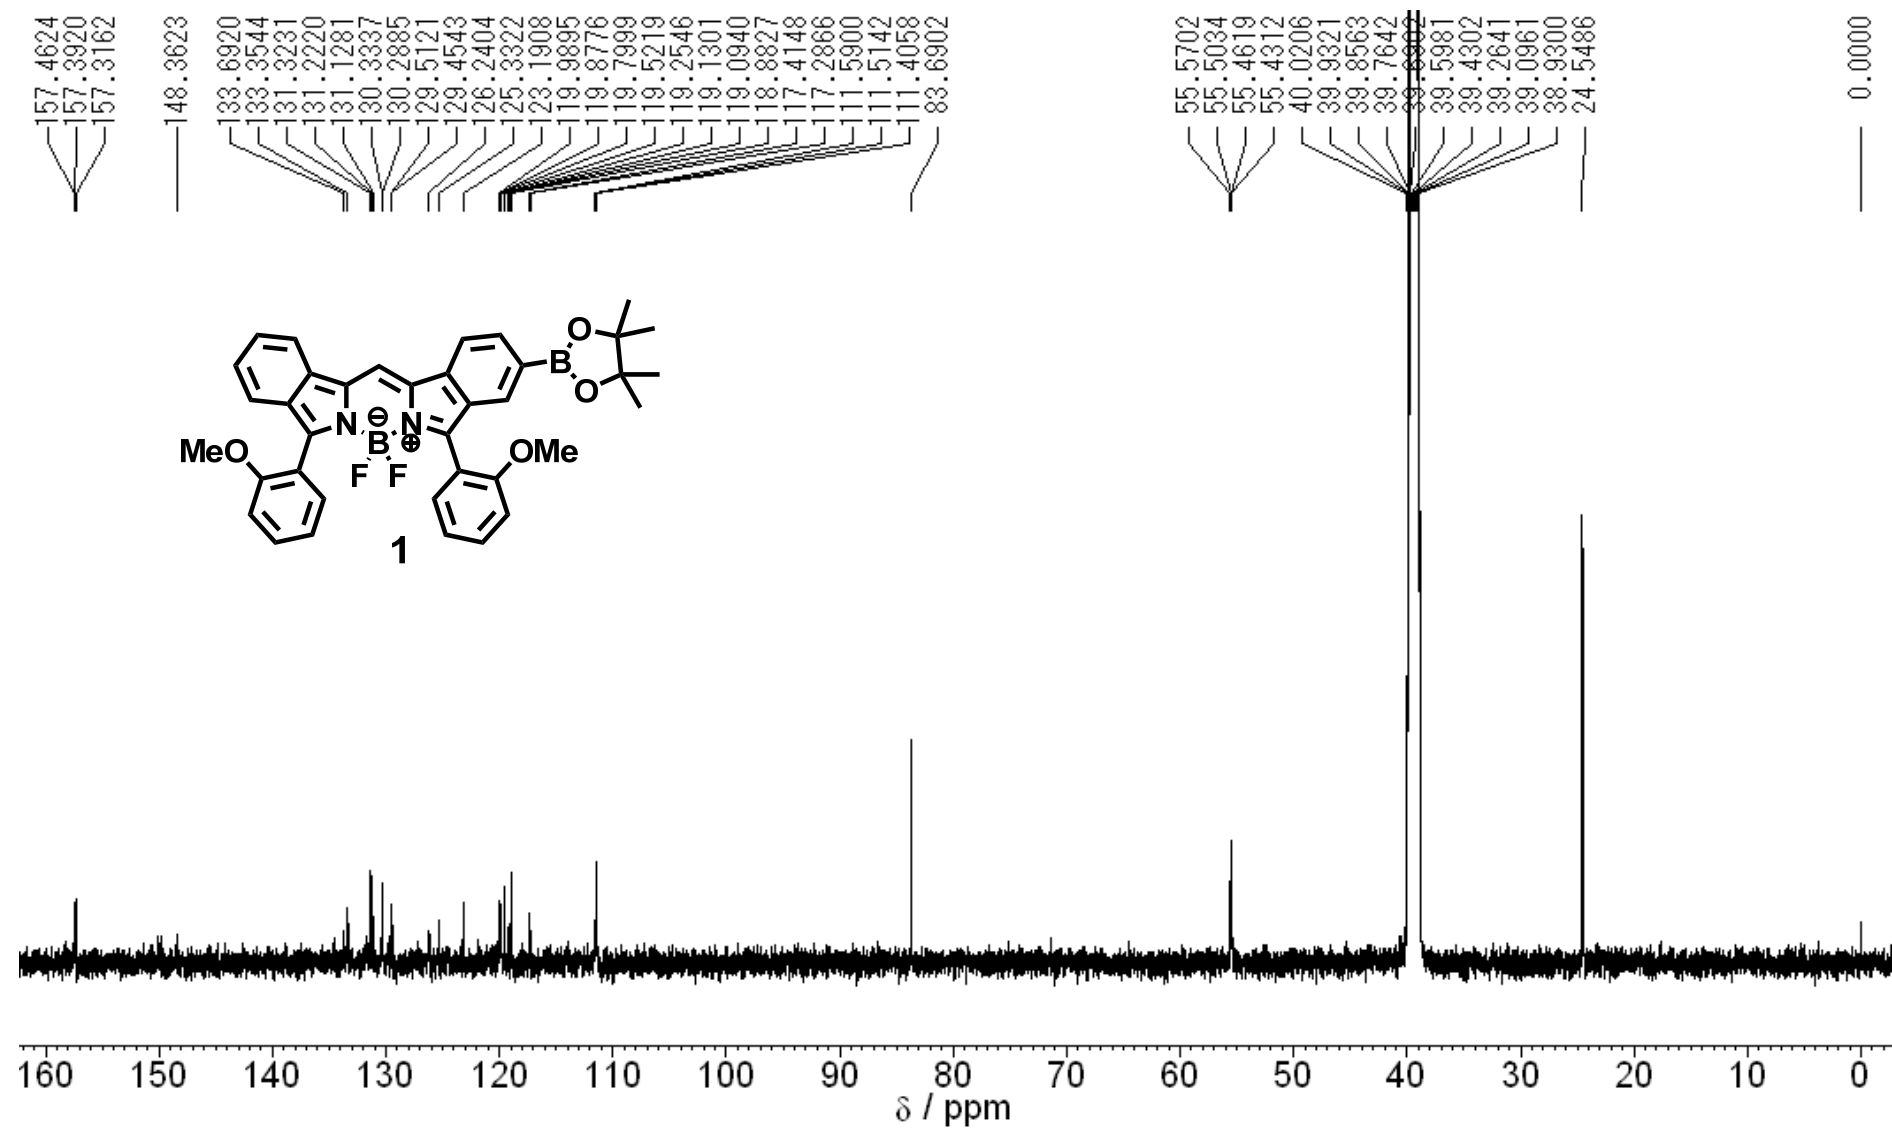

**Fig. S4**  $^{13}\text{C}$  NMR spectrum of dye **1** in  $\text{DMSO-}d_6$  at room temperature.

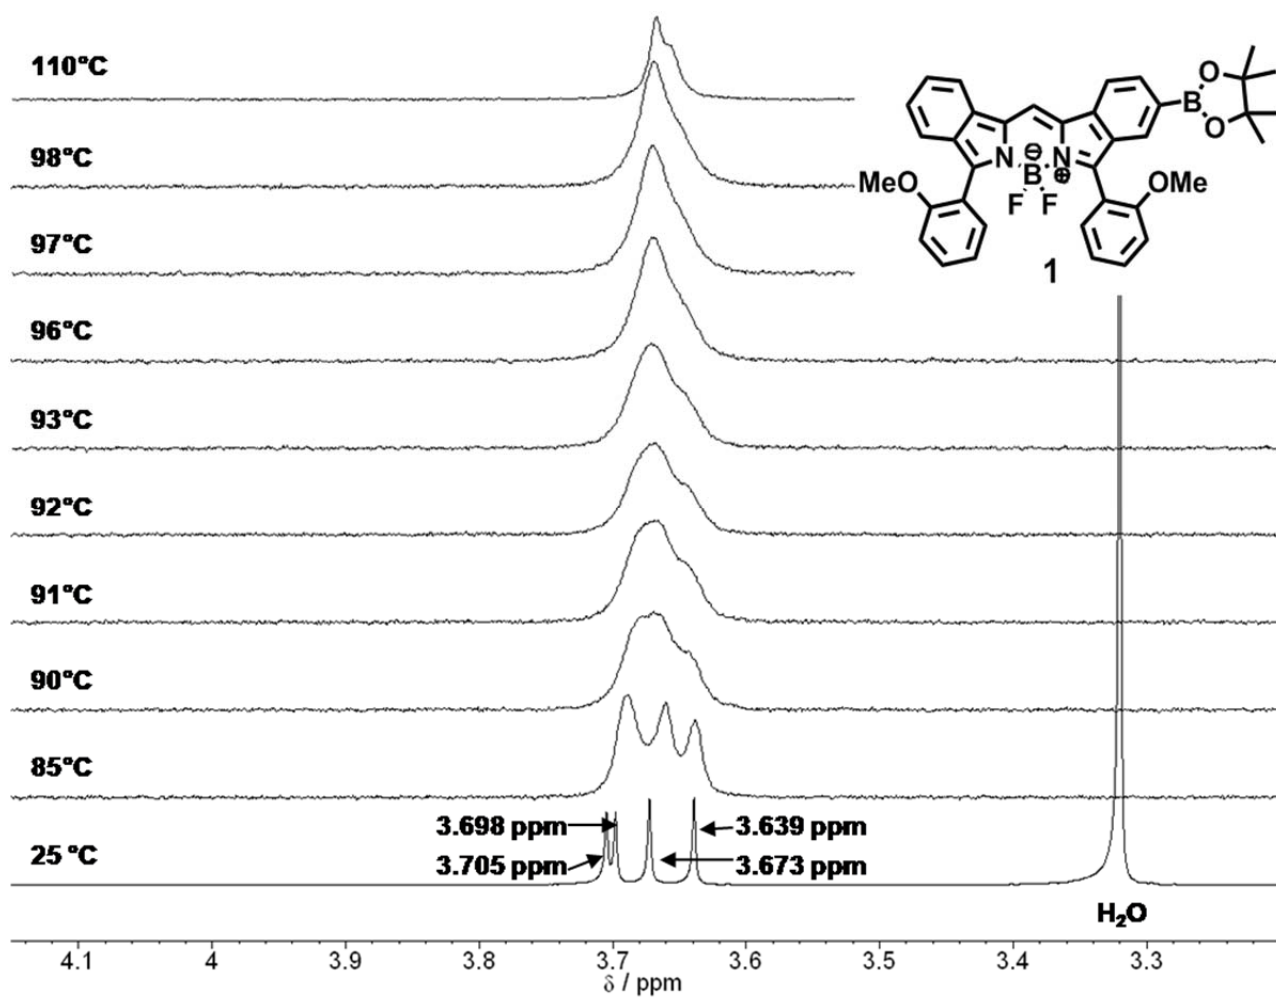

**Fig. S5** Variable temperature  $^1\text{H}$  NMR spectra of **1** in  $\text{DMSO-}d_6$ , revealing that one set of signals due to 3.673 and 3.705 ppm was firstly coalesced at 92 °C followed by second coalescence at 97 °C between other signals due to methoxy protons ( $\Delta G^\ddagger = 78.23 \text{ kJ mol}^{-1}$ ). It means that *anti*- and *syn*-isomers, in which the anisole moieties are located on the opposite and same face of the dibenzopyrromethene core, respectively, are present at room temperature in  $\text{DMSO-}d_6$ .

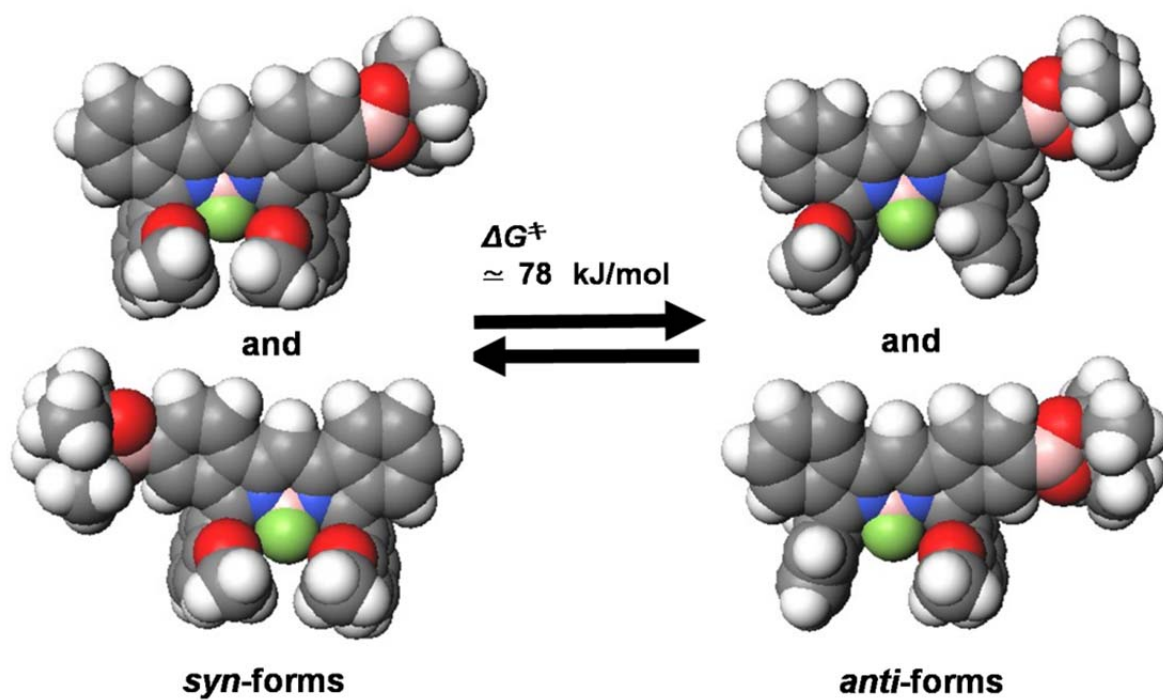

Fig. S6 Proposed isomers of 1.

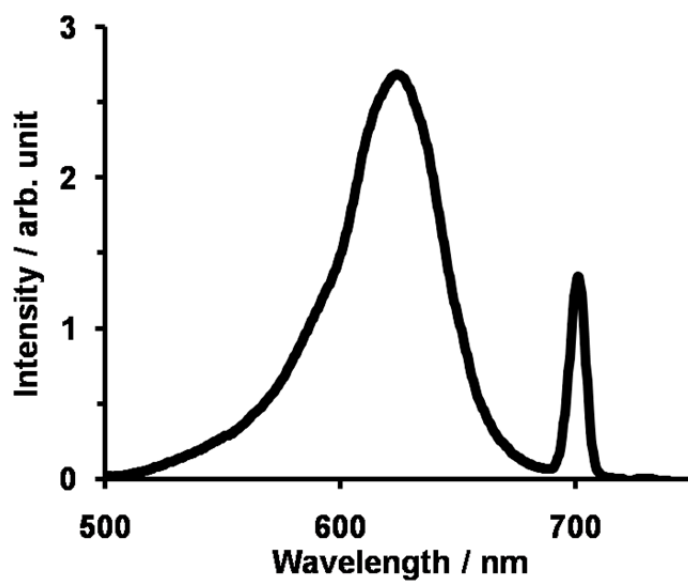

Fig. S7 Excitation spectrum of 1 (5  $\mu\text{M}$ ), which was associated with the emission, in THF at 25  $^\circ\text{C}$ .

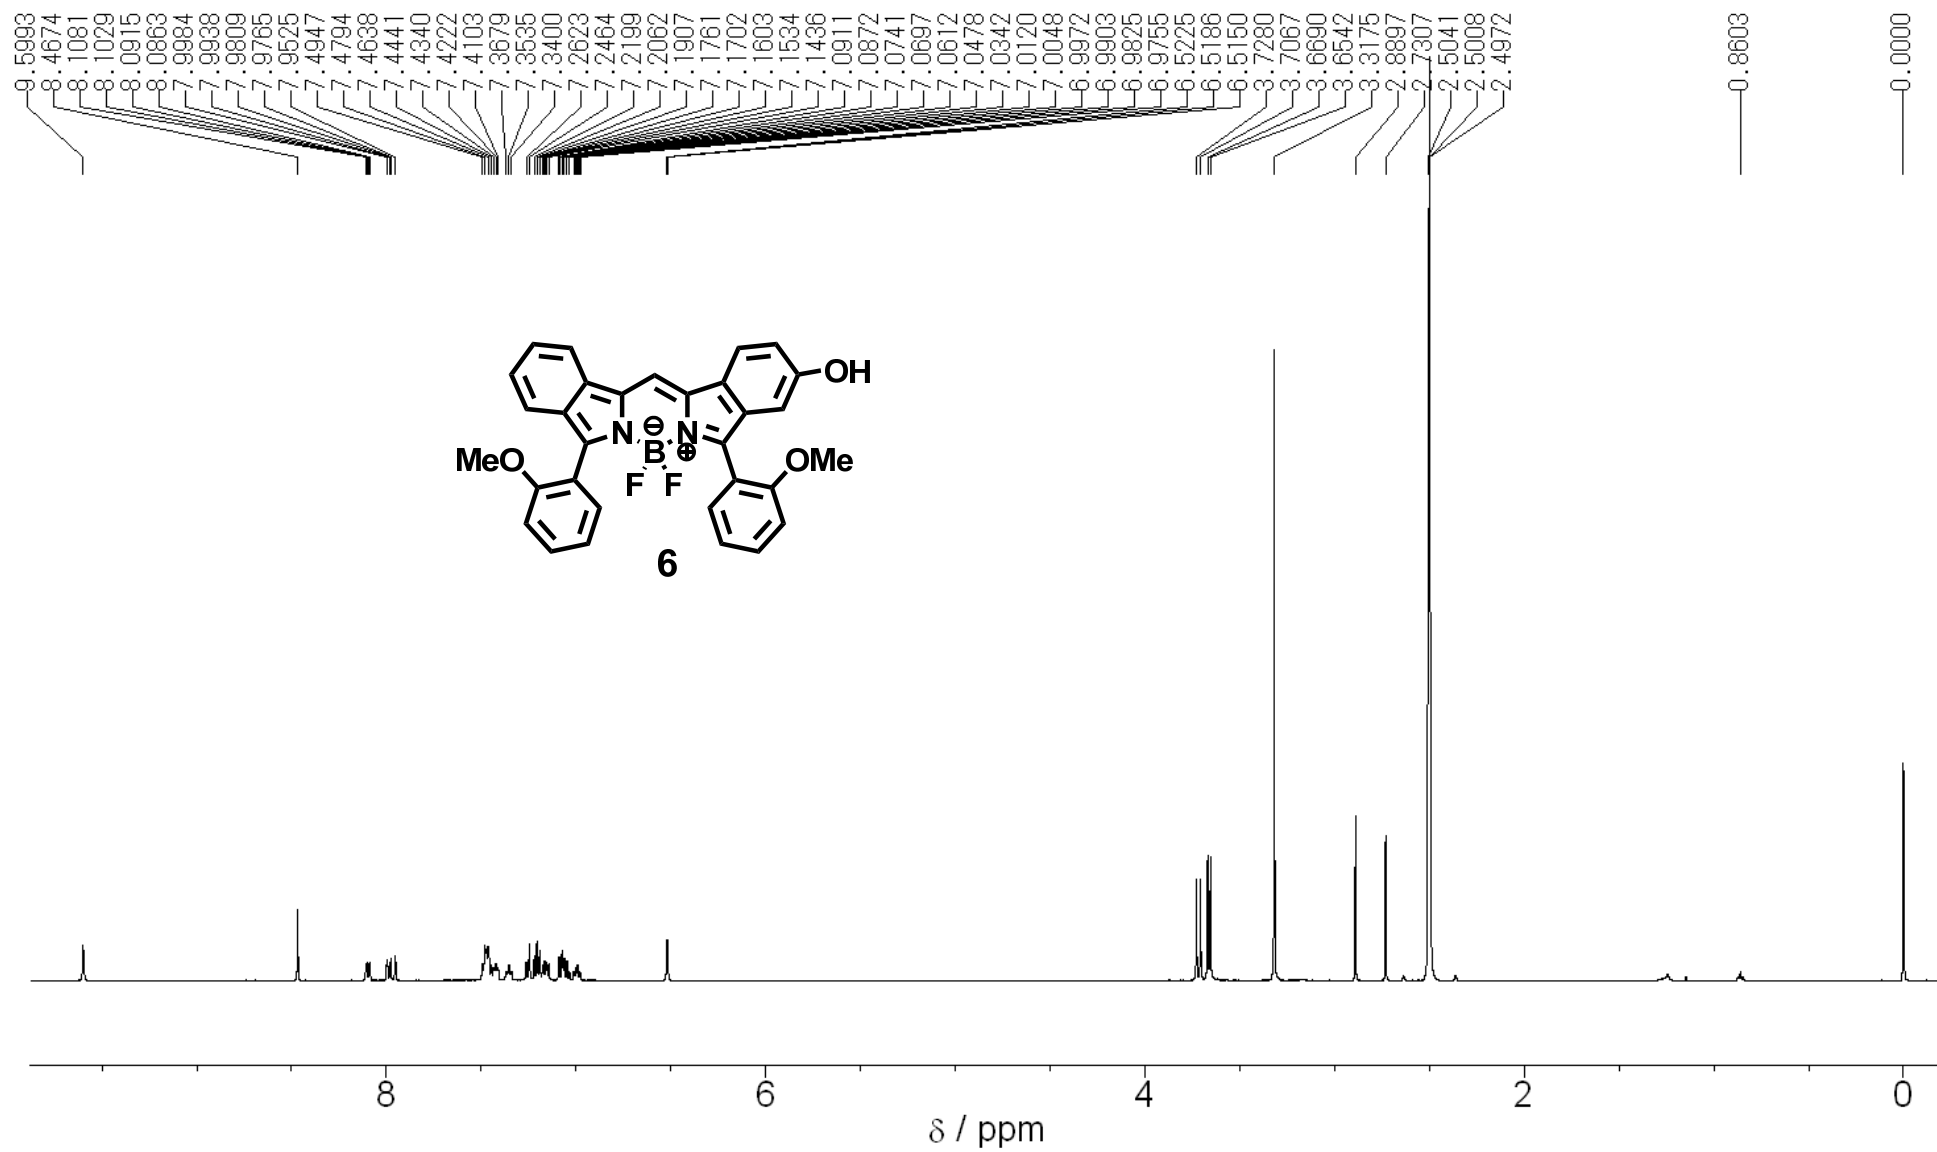

Fig. S8  $^1\text{H}$  NMR spectrum of dye 6 in  $\text{DMSO-}d_6$  at room temperature.



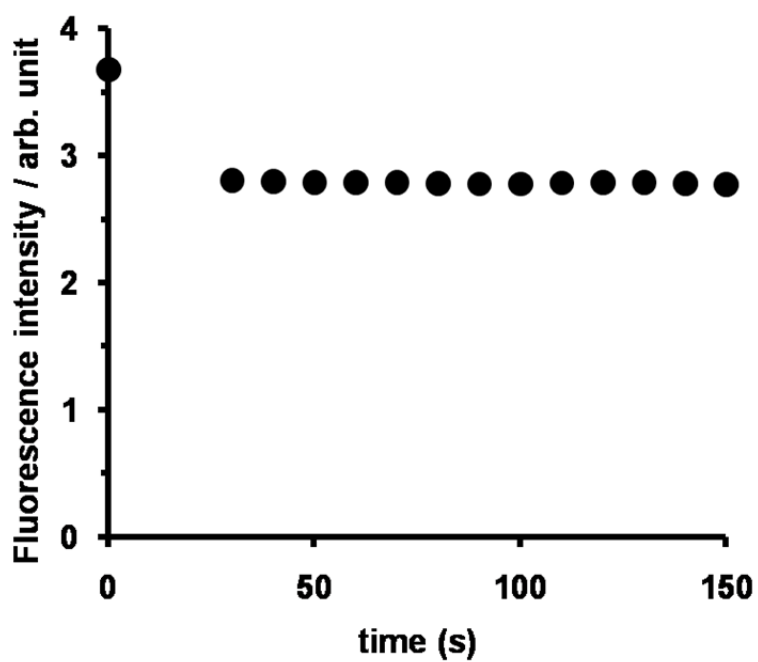

**Fig. S9** Time course of fluorescence spectra of **1** (5  $\mu\text{M}$ ) in the presence of TBAOH (50 $\mu\text{M}$ ) in EtOH/H<sub>2</sub>O (1:1 v/v) at 25 °C,  $\lambda_{\text{ex}}$ = 550 nm.

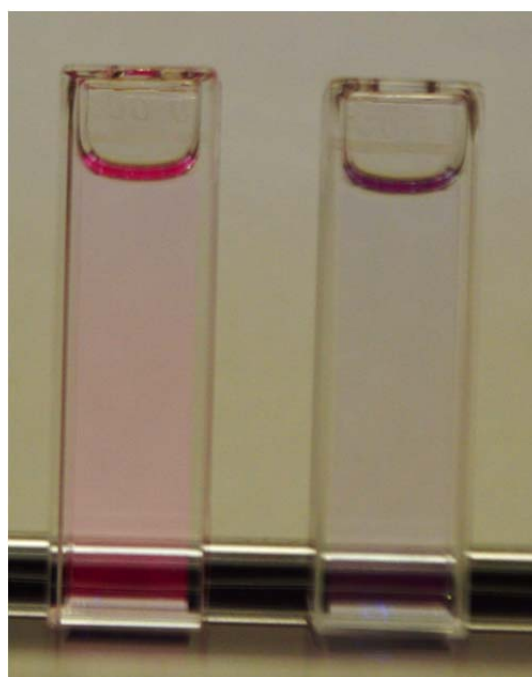

**Fig. S10** The photograph of **1** (5  $\mu\text{M}$ ) (left) and **1** (5  $\mu\text{M}$ ) with H<sub>2</sub>O<sub>2</sub> (80  $\mu\text{M}$ ) (right) in EtOH/H<sub>2</sub>O (1:1 v/v) in the presence of TBAOH (50  $\mu\text{M}$ ) at room temperature.
